# Supplementary material for: Ethyl acetate extract of theMusa nanaflower inhibits osteoclastogenesis and suppresses NF-κB and MAPK pathways
Source: Royal Society of Chemistry journal article supplement (doi:10.1039/d1fo02204k), 2021-01-01
Supplement: d1fo02204k1.pdf [file d1fo02204k1.pdf]

**Ethyl acetate extract of the *Musa nana* flower inhibits osteoclastogenesis and suppresses NF- $\kappa$ B and MAPK pathways**

**--Supplementary Materials--**

Min-Min Tang<sup>†a,b,c,d</sup>, Ying-Jie Chen<sup>†b</sup>, Jia-Ying Wu<sup>b</sup>, Aftab Amin<sup>b</sup>, Xue-Ming Zhou<sup>a,d</sup>, Jin Cai<sup>a,d</sup>, Guang-Ying Chen<sup>a,d\*</sup>, Zhi-Ling Yu<sup>b\*</sup>

<sup>a</sup>Key Laboratory of Tropical Medicinal Resource Chemistry of Ministry of Education, College of Chemistry and Chemical Engineering, Hainan Normal University, Haikou, 571158, China

<sup>b</sup>Centre for Cancer and Inflammation Research, School of Chinese Medicine, Hong Kong Baptist University, Hong Kong, 999077, China

<sup>c</sup>Coconut Research Institute of Chinese Academy of Tropical Agricultural Sciences, Wenchang, Hainan, 571339, China

<sup>d</sup>Key Laboratory of Tropical Medicinal Plant Chemistry of Hainan Province, College of Chemistry and Chemical Engineering, Hainan Normal University, Haikou, 571158, China

<sup>†</sup>Authors contributed equally to this study.

\*Corresponding authors at: Key Laboratory of Tropical Medicinal Resource Chemistry of Ministry of Education, College of Chemistry and Chemical Engineering, Hainan Normal University, Haikou, 571158, China (GY. Chen); School of Chinese Medicine, Hong Kong Baptist University, Hong Kong, 999077, China (ZL. Yu).

*E-mail addresses:* chgying123@163.com (GY. Chen), zlyu@hkbu.edu.hk (ZL. Yu).

**Table S1.** Reference standards used in UPLC-MS/MS analyses

| <b>No.</b> | <b>Compound</b>           | <b>CAS No.</b> | <b>No.</b> | <b>Compound</b>         | <b>CAS No.</b> | <b>No.</b> | <b>Compound</b>   | <b>CAS No.</b> | <b>No.</b> | <b>Compound</b>                 | <b>CAS No.</b> |
|------------|---------------------------|----------------|------------|-------------------------|----------------|------------|-------------------|----------------|------------|---------------------------------|----------------|
| 1          | Protocatechuic acid       | 99-50-3        | 25         | Luteolin                | 491-70-3       | 49         | Icariin           | 489-32-7       | 73         | Glycitin                        | 40246-10-4     |
| 2          | Protocatechualdehyde      | 139-85-5       | 26         | (-)-Epicatechin gallate | 1257-08-5      | 50         | Isoliquiritigenin | 961-29-5       | 74         | Genistin                        | 446-72-0       |
| 3          | Apigenin-7-glucoside      | 578-74-5       | 27         | Acacetin                | 480-44-4       | 51         | Isosakuranetin    | 480-43-3       | 75         | Vitexin rhamnoside              | 64820-99-1     |
| 4          | (-)-Gallocatechin gallate | 4233-96-9      | 28         | Amentoflavone           | 1617-53-4      | 52         | Kaempferide       | 491-54-3       | 76         | Biochanin A                     | 491-80-5       |
| 5          | Pyrocatechol              | 120-80-9       | 29         | Apigenin                | 520-36-5       | 53         | Kaempferitrin     | 482-38-2       | 77         | Isorhamnetin-3-O-nehesperidine  | 55033-90-4     |
| 6          | Rutin                     | 153-18-4       | 30         | Astilbin                | 29838-67-3     | 54         | Liquiritin        | 551-15-5       | 78         | Baicalin                        | 21967-41-9     |
| 7          | Hyperoside                | 482-36-0       | 31         | Avicularin              | 572-30-5       | 55         | Myricitrin        | 17912-87-7     | 79         | Silibinin                       | 22888-70-6     |
| 8          | Isoquercitrin             | 482-35-9       | 32         | Baicalein               | 491-67-8       | 56         | Narirutin         | 14259-46-2     | 80         | Farrerol                        | 24211-30-1     |
| 9          | Kaempferol-3-O-rutinoside | 17650-84-9     | 33         | Chrysin                 | 480-40-0       | 57         | Neohesperidin     | 13241-33-3     | 81         | Apiin                           | 26544-34-3     |
| 10         | Cynaroside                | 5373-11-5      | 34         | Cianidanol              | 18829-70-4     | 58         | Nobiletin         | 478-01-3       | 82         | Puerarin                        | 3681-99-0      |
| 11         | Quercetin                 | 522-12-3       | 35         | Daidzin                 | 552-66-9       | 59         | Orientin          | 28608-75-5     | 83         | Sciadopitysin                   | 521-34-6       |
| 12         | Kaempferol                | 520-18-3       | 36         | Diosmin                 | 520-27-4       | 60         | Phloretin         | 60-82-2        | 84         | Cyanidin                        | 13306-05-3     |
| 13         | Ononin                    | 486-62-4       | 37         | Engeletin               | 572-31-6       | 61         | Pinocembrin       | 480-39-7       | 85         | Cyanidin-3-O-glucoside          | 4233-96-9      |
| 14         | Myricetin                 | 529-44-2       | 38         | Eriocitrin              | 13463-28-0     | 62         | Quercitrin        | 117-39-5       | 86         | Gallocatechin                   | 970-73-0       |
| 15         | Diosmetin                 | 520-34-3       | 39         | Eriodictyol             | 552-58-9       | 63         | Rhoifolin         | 17306-46-6     | 87         | <i>L</i> -Epicatechin           | 490-46-0       |
| 16         | Taxifolin                 | 480-18-2       | 40         | Galangin                | 548-83-4       | 64         | Schaftoside       | 51938-32-0     | 88         | Procyanidin B1                  | 20315-25-7     |
| 17         | Dihydromyricetin          | 27200-12-0     | 41         | Genistein               | 529-59-9       | 65         | sinensetin        | 28608-75-5     | 89         | Procyanidin B2                  | 29106-49-8     |
| 18         | Isorhamnetin              | 480-19-3       | 42         | Genkwanin               | 437-64-9       | 66         | Tectochrysin      | 520-28-5       | 90         | (-)-Epigallocatechin gallate    | 989-51-5       |
| 19         | Chalconearigenin          | 25515-46-2     | 43         | Glabridin               | 59870-68-7     | 67         | Tiliroside        | 20316-62-5     | 91         | (-)-Epigallocatechin            | 970-74-1       |
| 20         | Naringenin                | 480-41-1       | 44         | Glycitein               | 40957-83-3     | 68         | Troloxerutin      | 7085-55-4      | 92         | Cyanidin Chloride               | 528-58-5       |
| 21         | Astragaln                 | 480-10-4       | 45         | Hesperetin              | 520-33-2       | 69         | Vitexin           | 3681-93-4      | 93         | Cyanidin-3-O-glucoside chloride | 7084-24-4      |
| 22         | Narcissoside              | 59870-68-7     | 46         | Hesperidin              | 520-26-3       | 70         | Tangeretin        | 481-53-8       |            |                                 |                |
| 23         | Tectorigenin              | 548-77-6       | 47         | Homoorientin            | 4261-42-1      | 71         | Fisetin           | 528-48-3       |            |                                 |                |
| 24         | Spinosin                  | 72063-39-9     | 48         | Hydroxygenkwanin        | 20243-59-8     | 72         | Poncirin          | 14941-08-3     |            |                                 |                |

**Table S2.** Primers used for RT-qPCR

| Gene         | Primer sequence, 5'-3'      |                           |
|--------------|-----------------------------|---------------------------|
|              | Forward                     | Reverse                   |
| <i>TRAP</i>  | GCCAAGATGGATTCATGGGTGG      | CAGAGACATGATGAAGTCAGCG    |
| <i>CTSK</i>  | GGCCAACCTCAAGAAGAAAAGT      | TCTCTGTACCCTCTGCATTTAGC   |
| <i>MMP-9</i> | CTTCTTCTCTGGACGTCAAATG      | CATTTTGGAAACTCACACGCC     |
| <i>OSCAR</i> | CTGCTGGTAACGGATCAGCTCCCCAGA | CCAAGGAGCCAGAACCTTCGAAACT |
| <i>TRAF6</i> | ATTCATTGTCAACTGGGCA         | TAAGTGTCCCATCTGCTTGA      |
| <i>RANK</i>  | CGAGGAAGATTCCCACAGAG        | CAGTGAAGTCACAGCCCTCA      |
| <i>ACTB</i>  | AGAGGGAAATCGTGCGTGAC        | CAATAGTGACCTGGCCGT        |

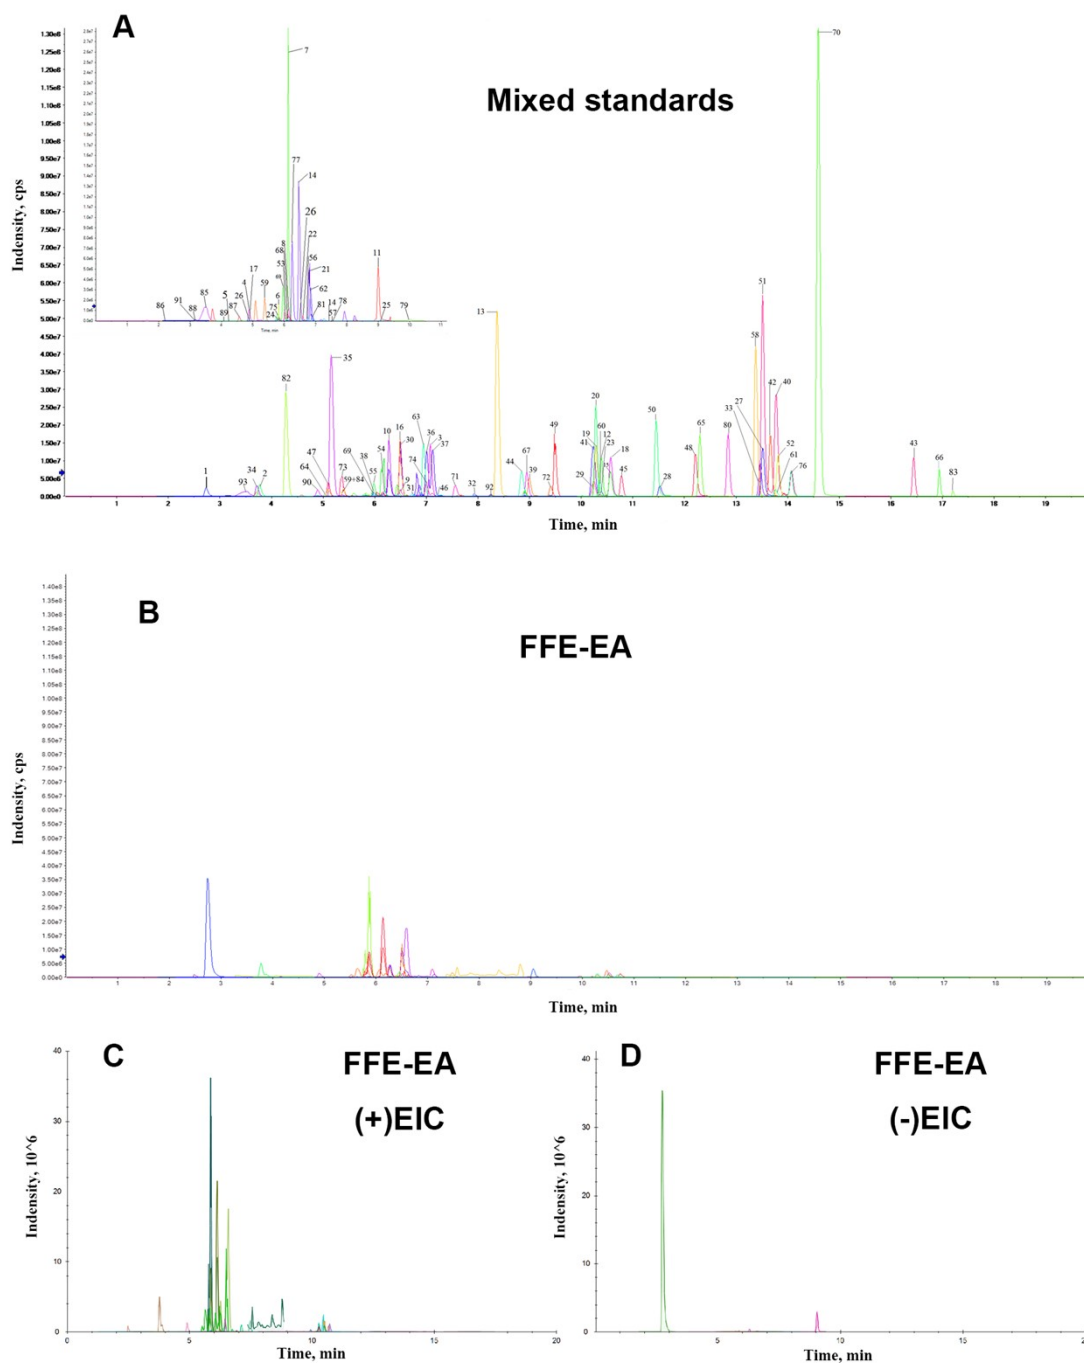

**Fig. S1. UHPLC-MS chromatograms.** (A) Total ion chromatograms of MRM traces from mixed standards. (B) Total ion chromatograms of MRM traces from FFE-EA. (C) Extracted ion chromatograms of MRM traces in positive ion mode from FFE-EA. (D) Extracted ion chromatograms of MRM traces in negative ion mode from FFE-EA. The indicated number of each peak in (A) was consistent with that of the compound in Table S1. The abbreviation “cps” in the ordinate means counts per second.

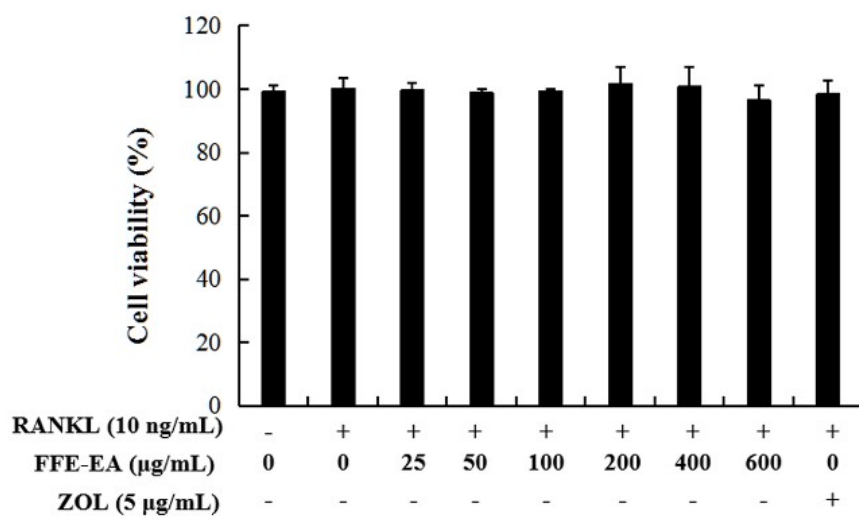

**Fig. S2. Effects of FEE-EA on the viability of RAW264.7 cells.** RAW264.7 cells were pre-treated with indicated concentrations of FEE-EA or ZOL (zoledronic acid; 5 µg/mL) for 1 hr and then treated with RANKL (10 ng/mL) or vehicle for another 24 hrs. Cytotoxicity was assessed using MTT assays.
